# Supplementary material for: Fluorescence In Situ Hybridization (FISH) Tests for Identifying Protozoan and Bacterial Pathogens in Infectious Diseases
Source: MDPI journal article supplement (doi:10.3390/diagnostics12051286), 2022-05-21
Supplement: s1 [file s1]

## Liquid culture

↓  
Add Sample Processing Buffer (1:1),  
5-10min room temp, add MycoSPR Buffer (8:1), mix

## Solid culture

↓  
Add a loopful of bacteria to water  
and glass beads, mix by vortexing

↓  
Make each smear with 10 µl of processed culture

↓ Air dry

Fix with phenol/ethanol 5 min

↓ Air-dry

Pre-treatment

↓ 15 min 37°C

Rinse 1x in Pre-treatment Rinse buffer

↓ Air-dry

Add 10 µl Hybridization Buffer with probes, cover with cover-slip

↓ 15 min 37°C

Wash with 1x wash buffer, 3x

↓ Air-dry in dark

Add mounting medium and cover with cover-slip

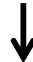

View at x1000 magnification in microscope with LED/filter attachment
